# Supplementary material for: Aging increases vulnerability to stress-induced depression via upregulation of NADPH oxidase in mice
Source: PubMed Central journal article supplement (PMC7275057; doi:10.1038/s42003-020-1010-5), 2020-06-05

# Supplementary Data1 - WB blot images

Shown in Fig. 3c

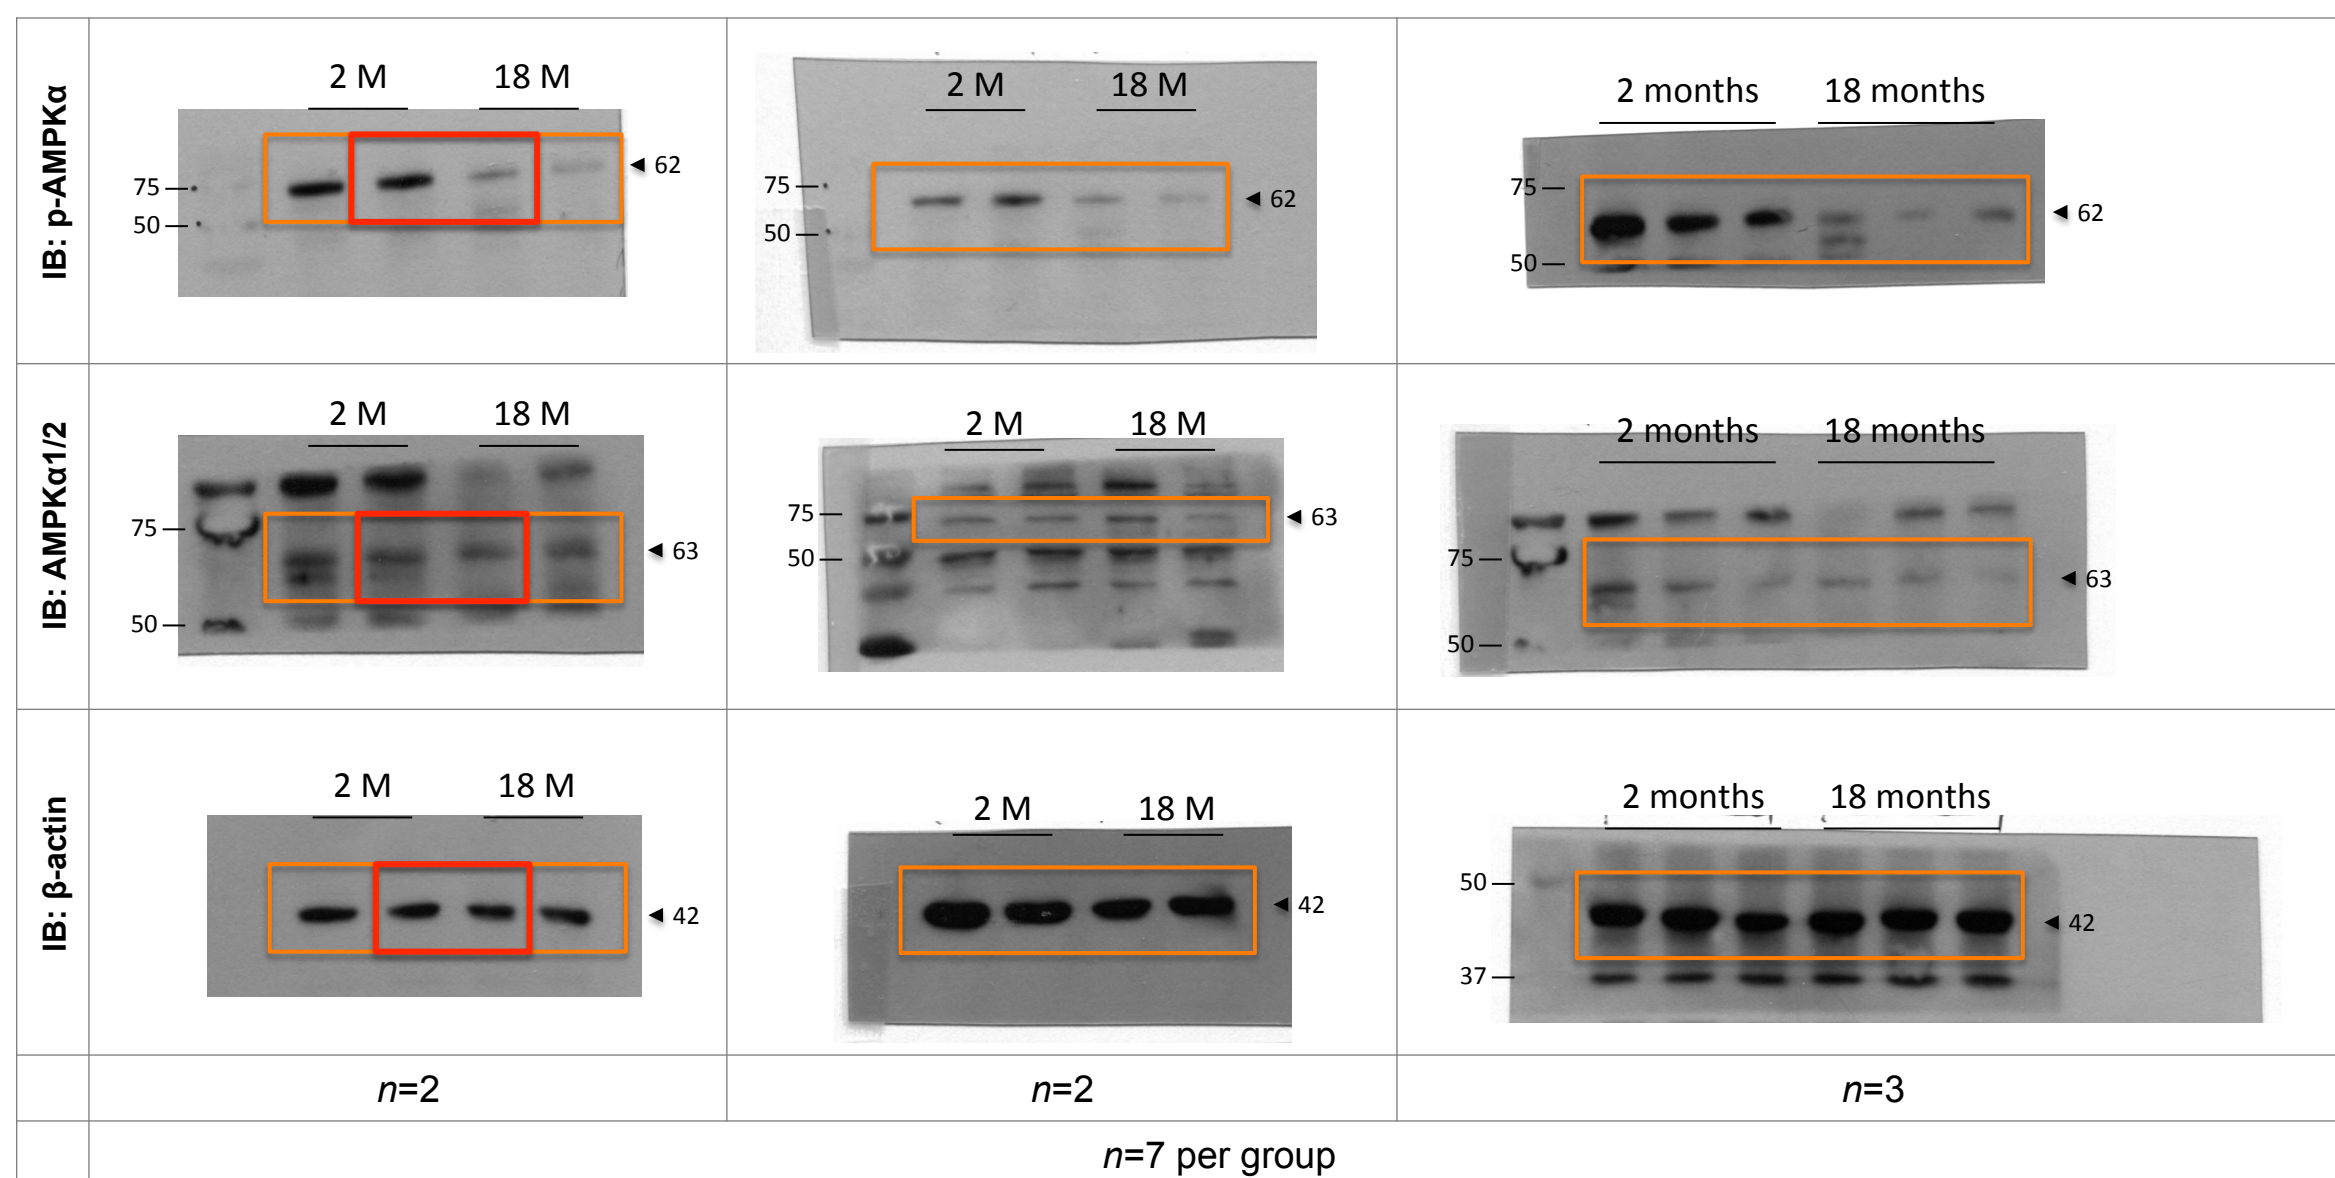

Shown in Fig. 3f

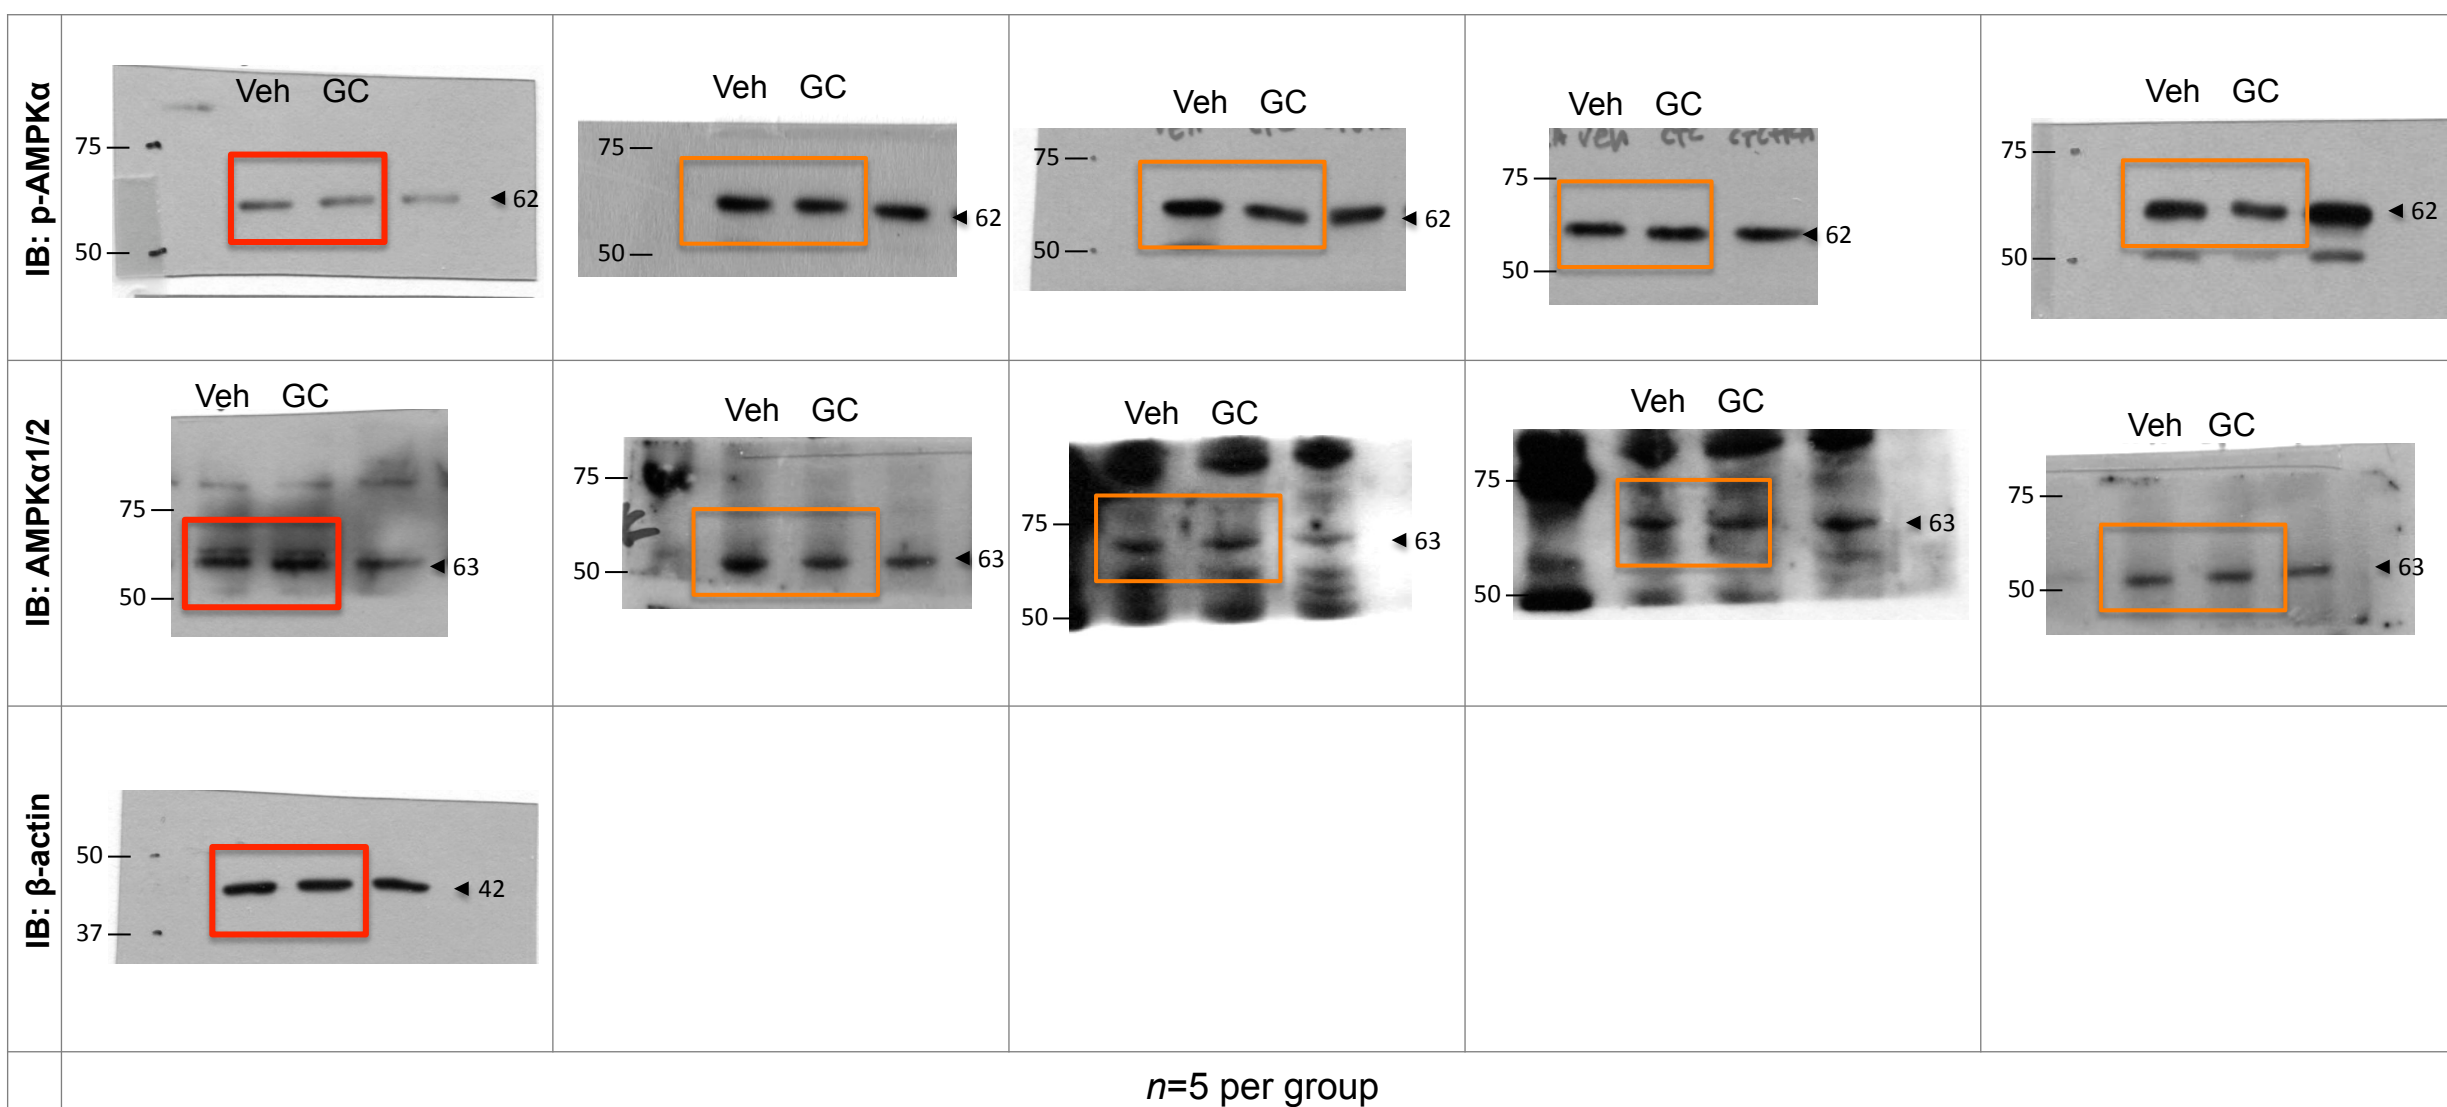

Shown in Fig. 4d

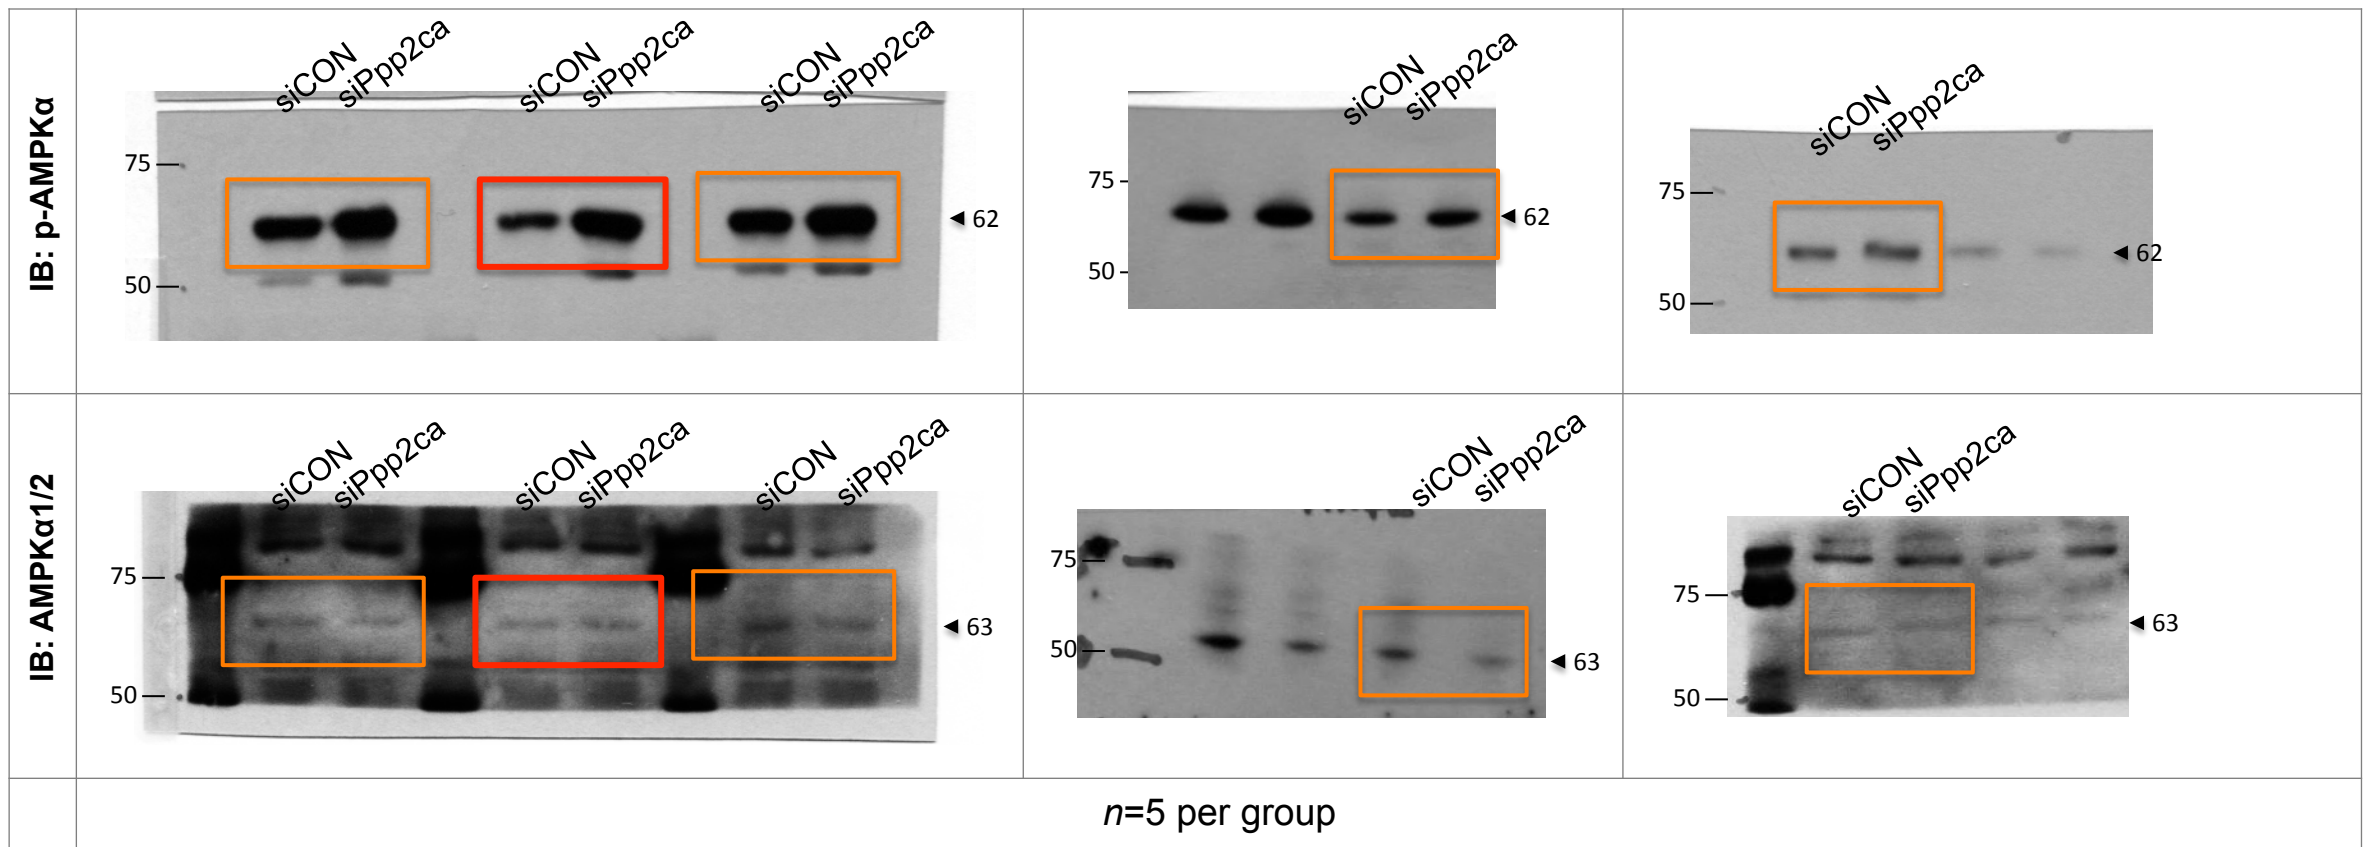

Shown in Fig. 5l

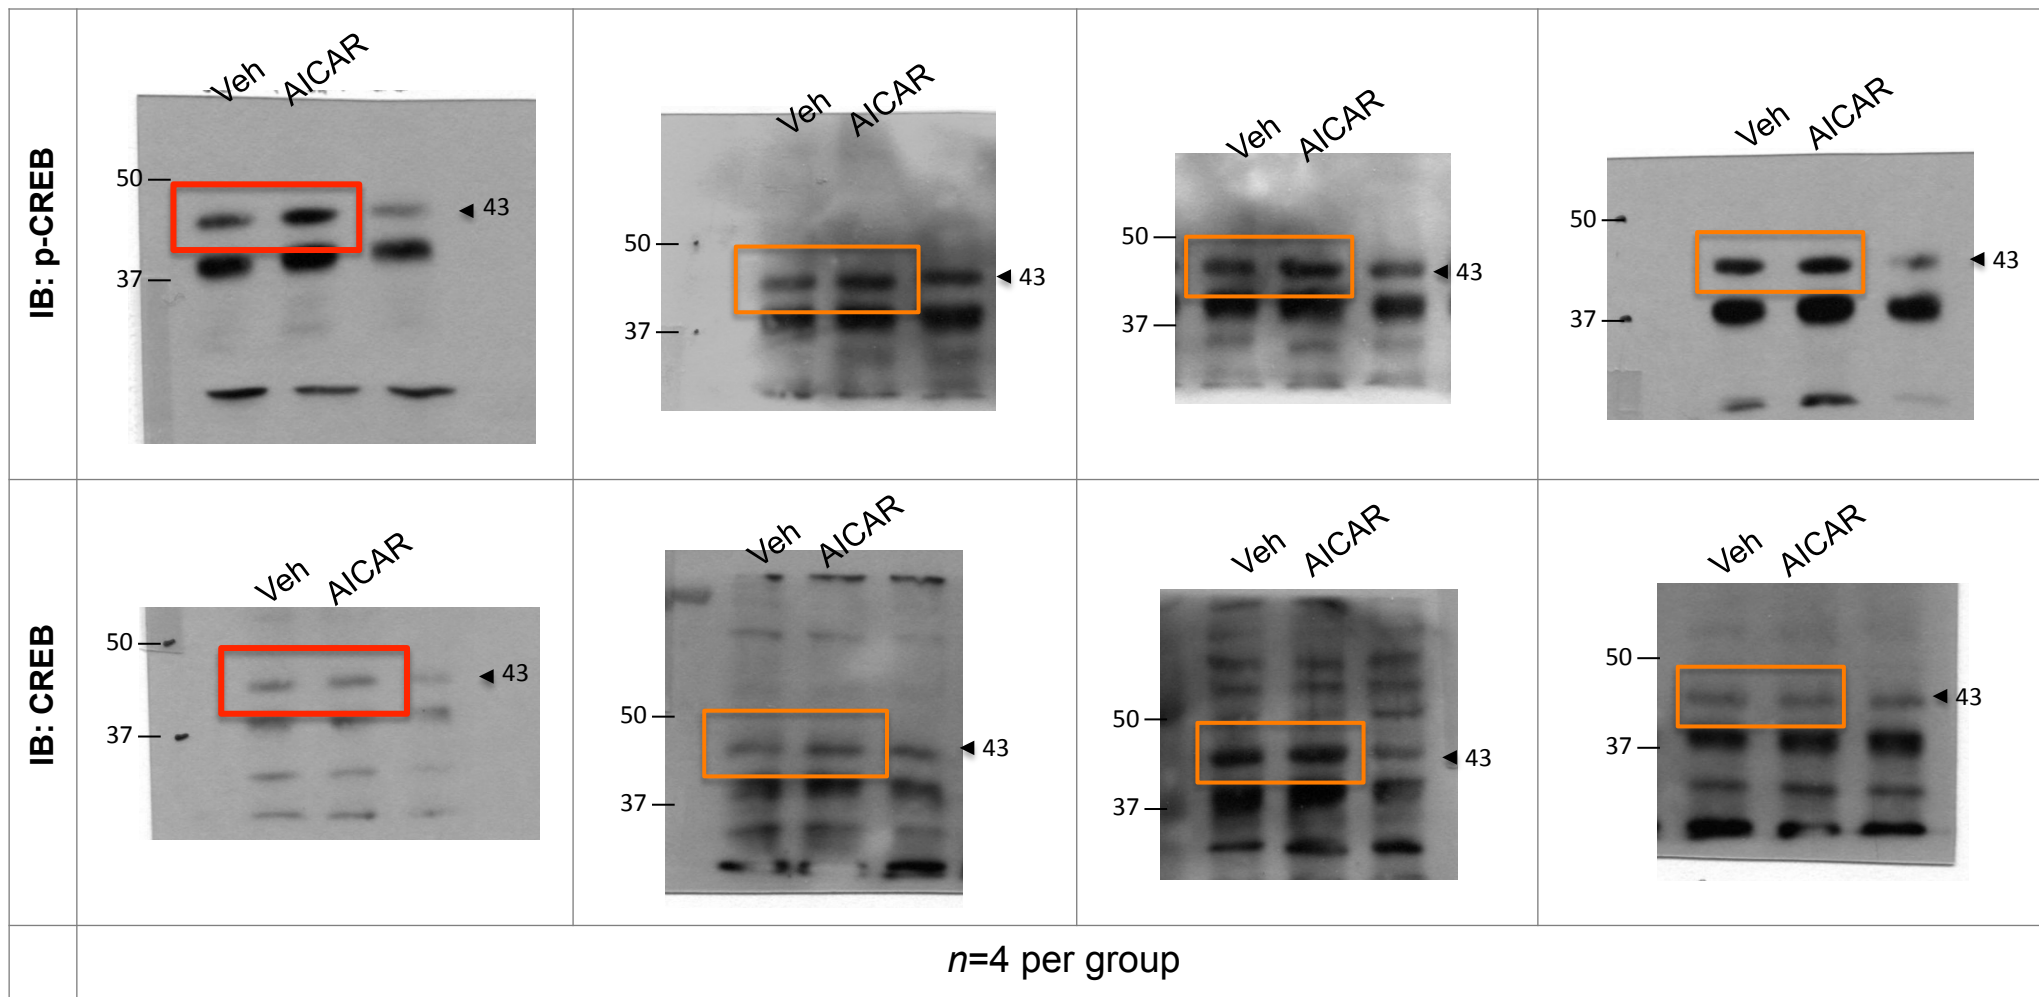

Shown in Fig. 5m

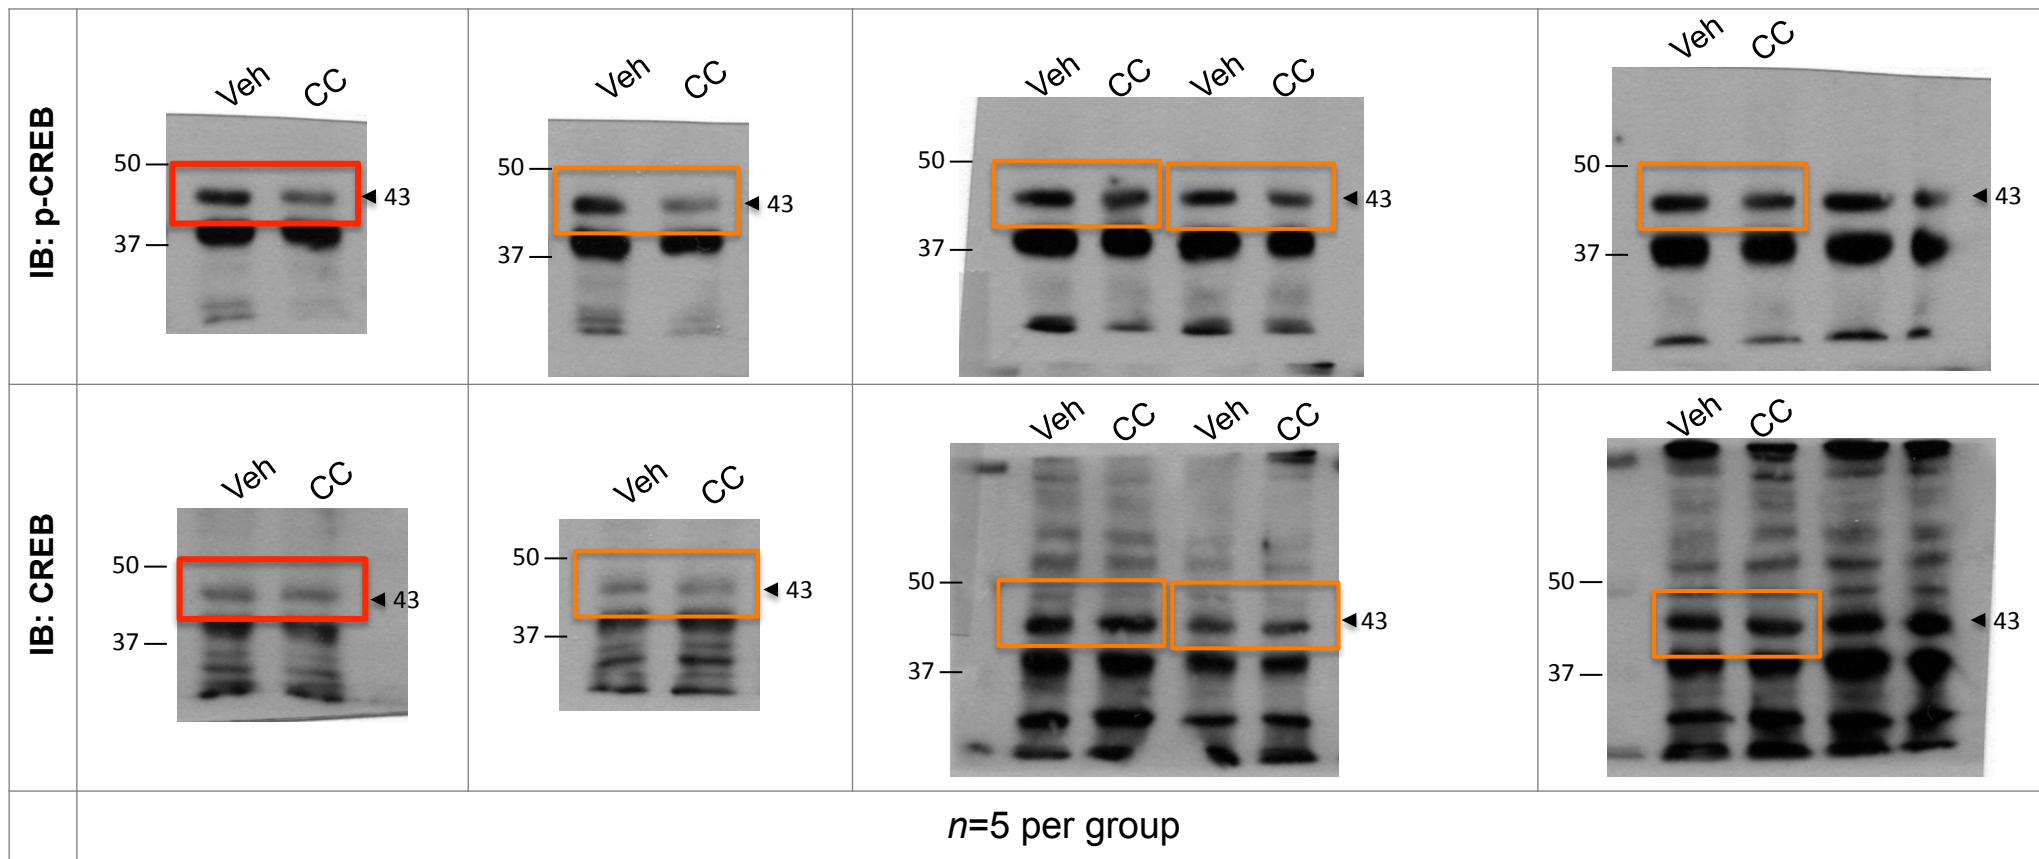

Shown in Supplemental Fig. 5b

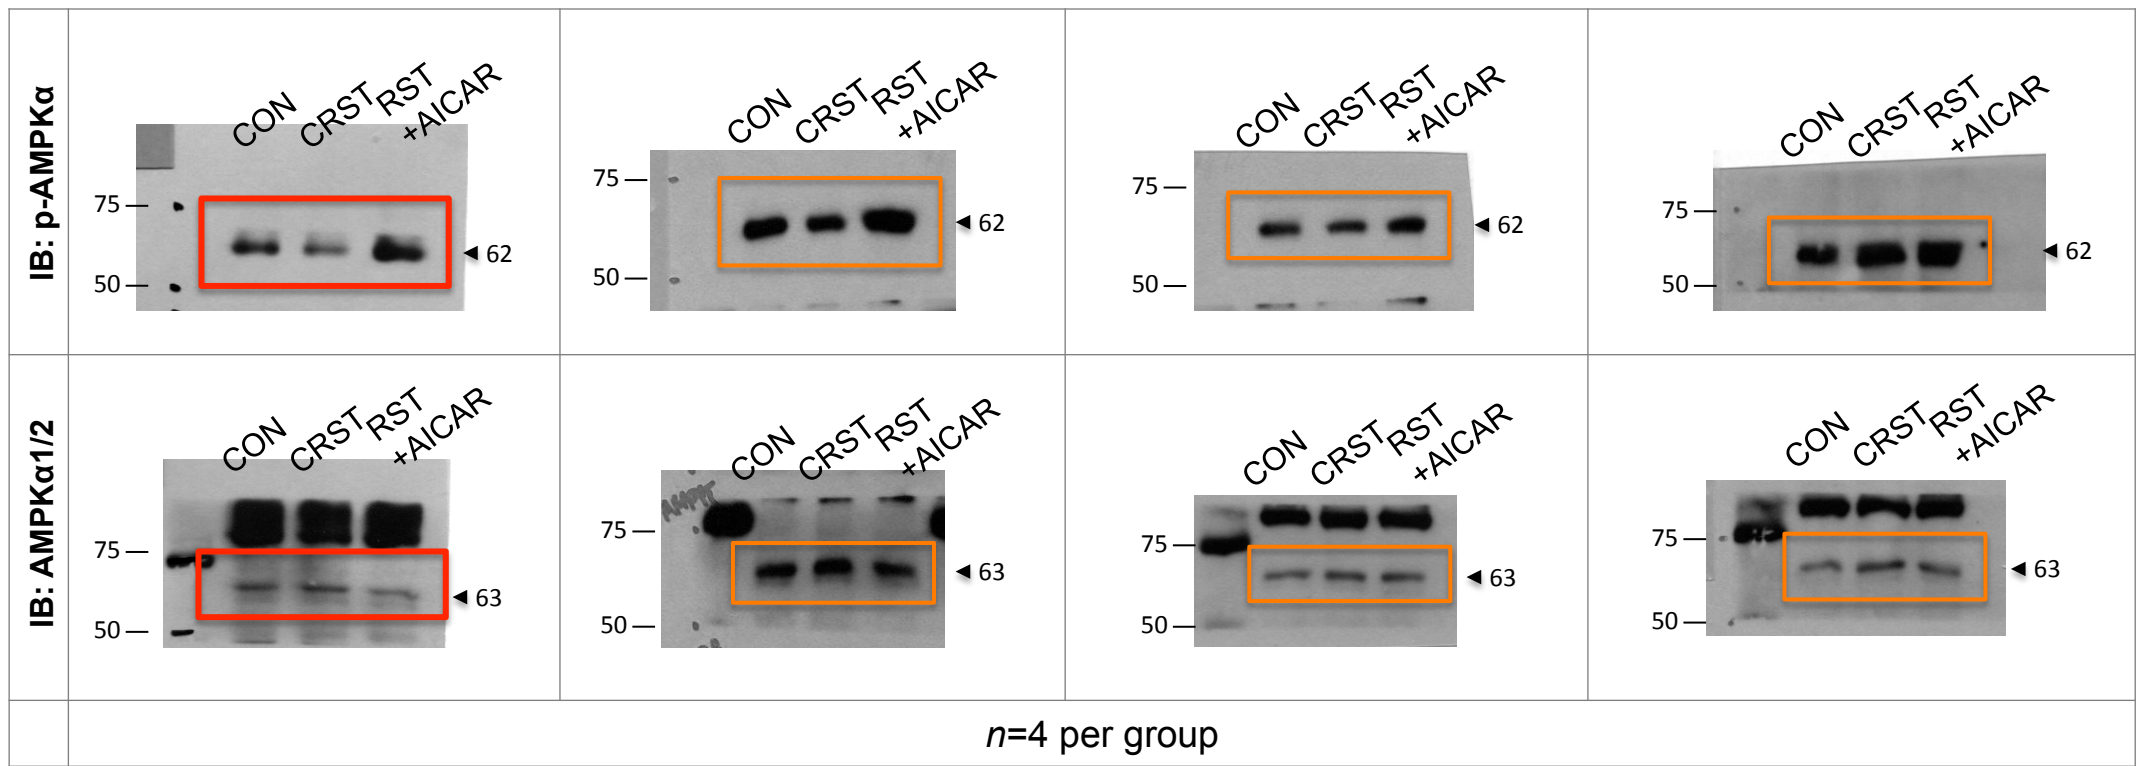

Shown in Supplemental Fig. 5h

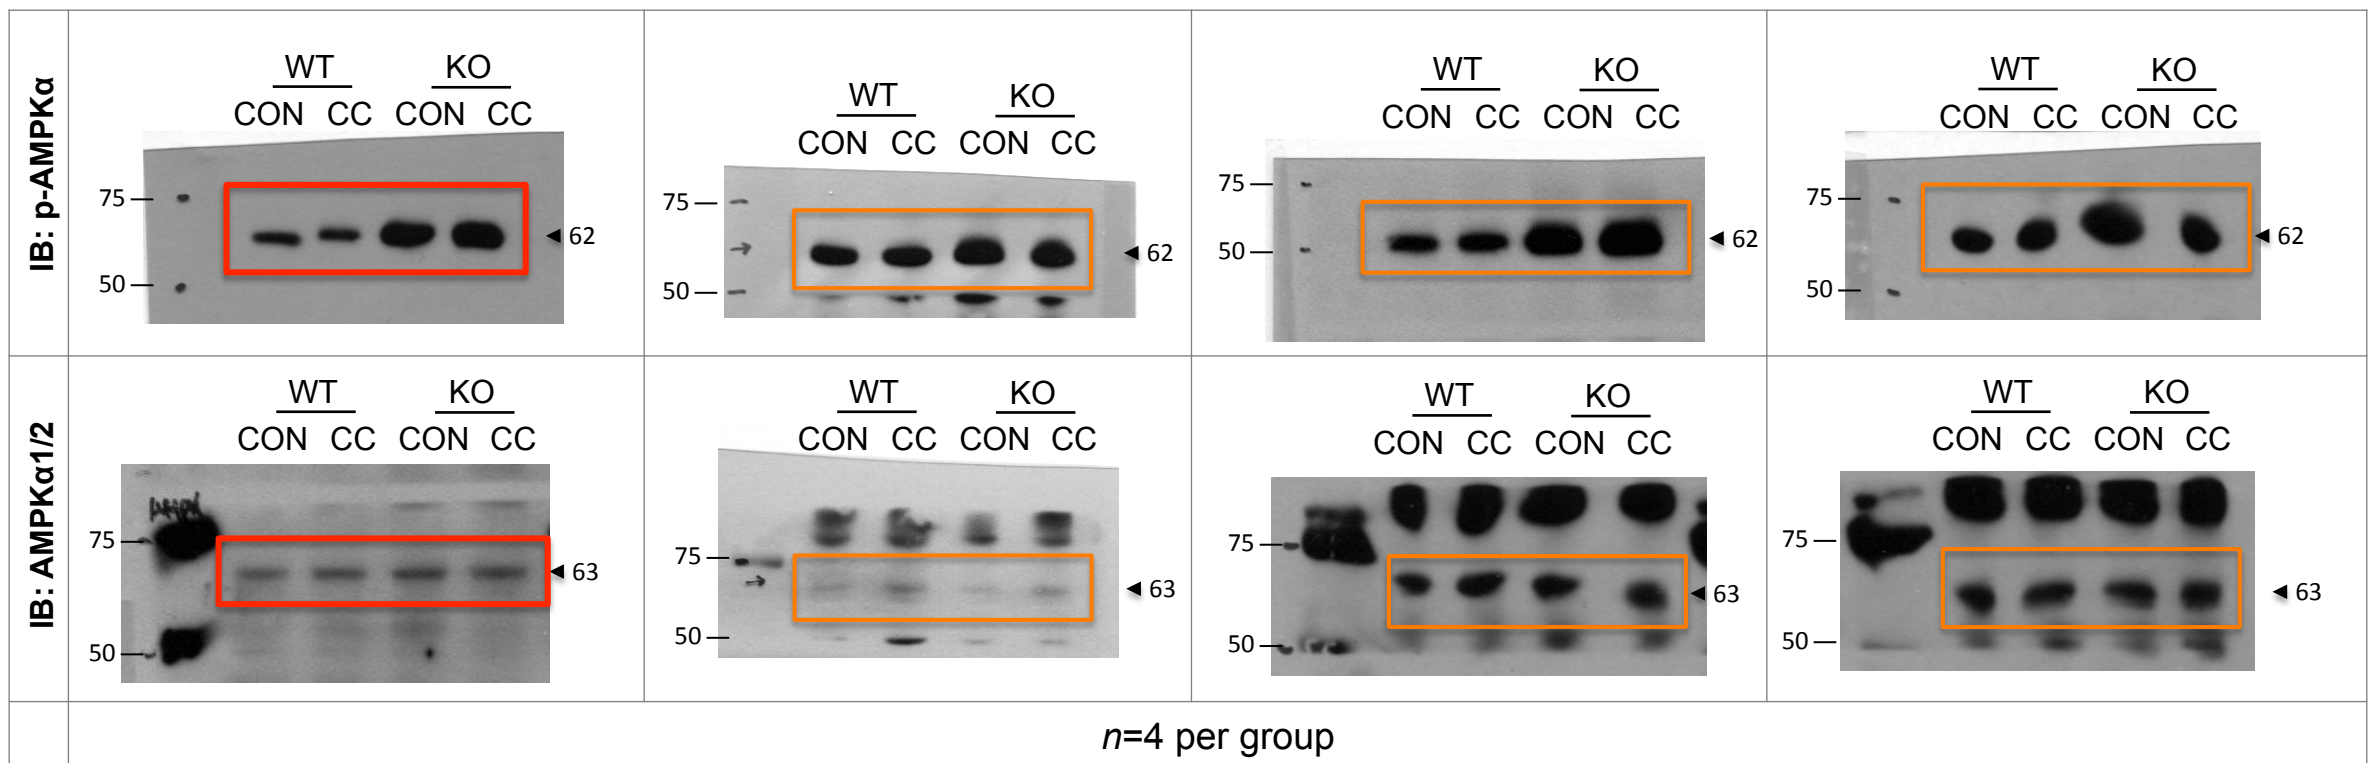

Shown in Supplemental Fig. 9c

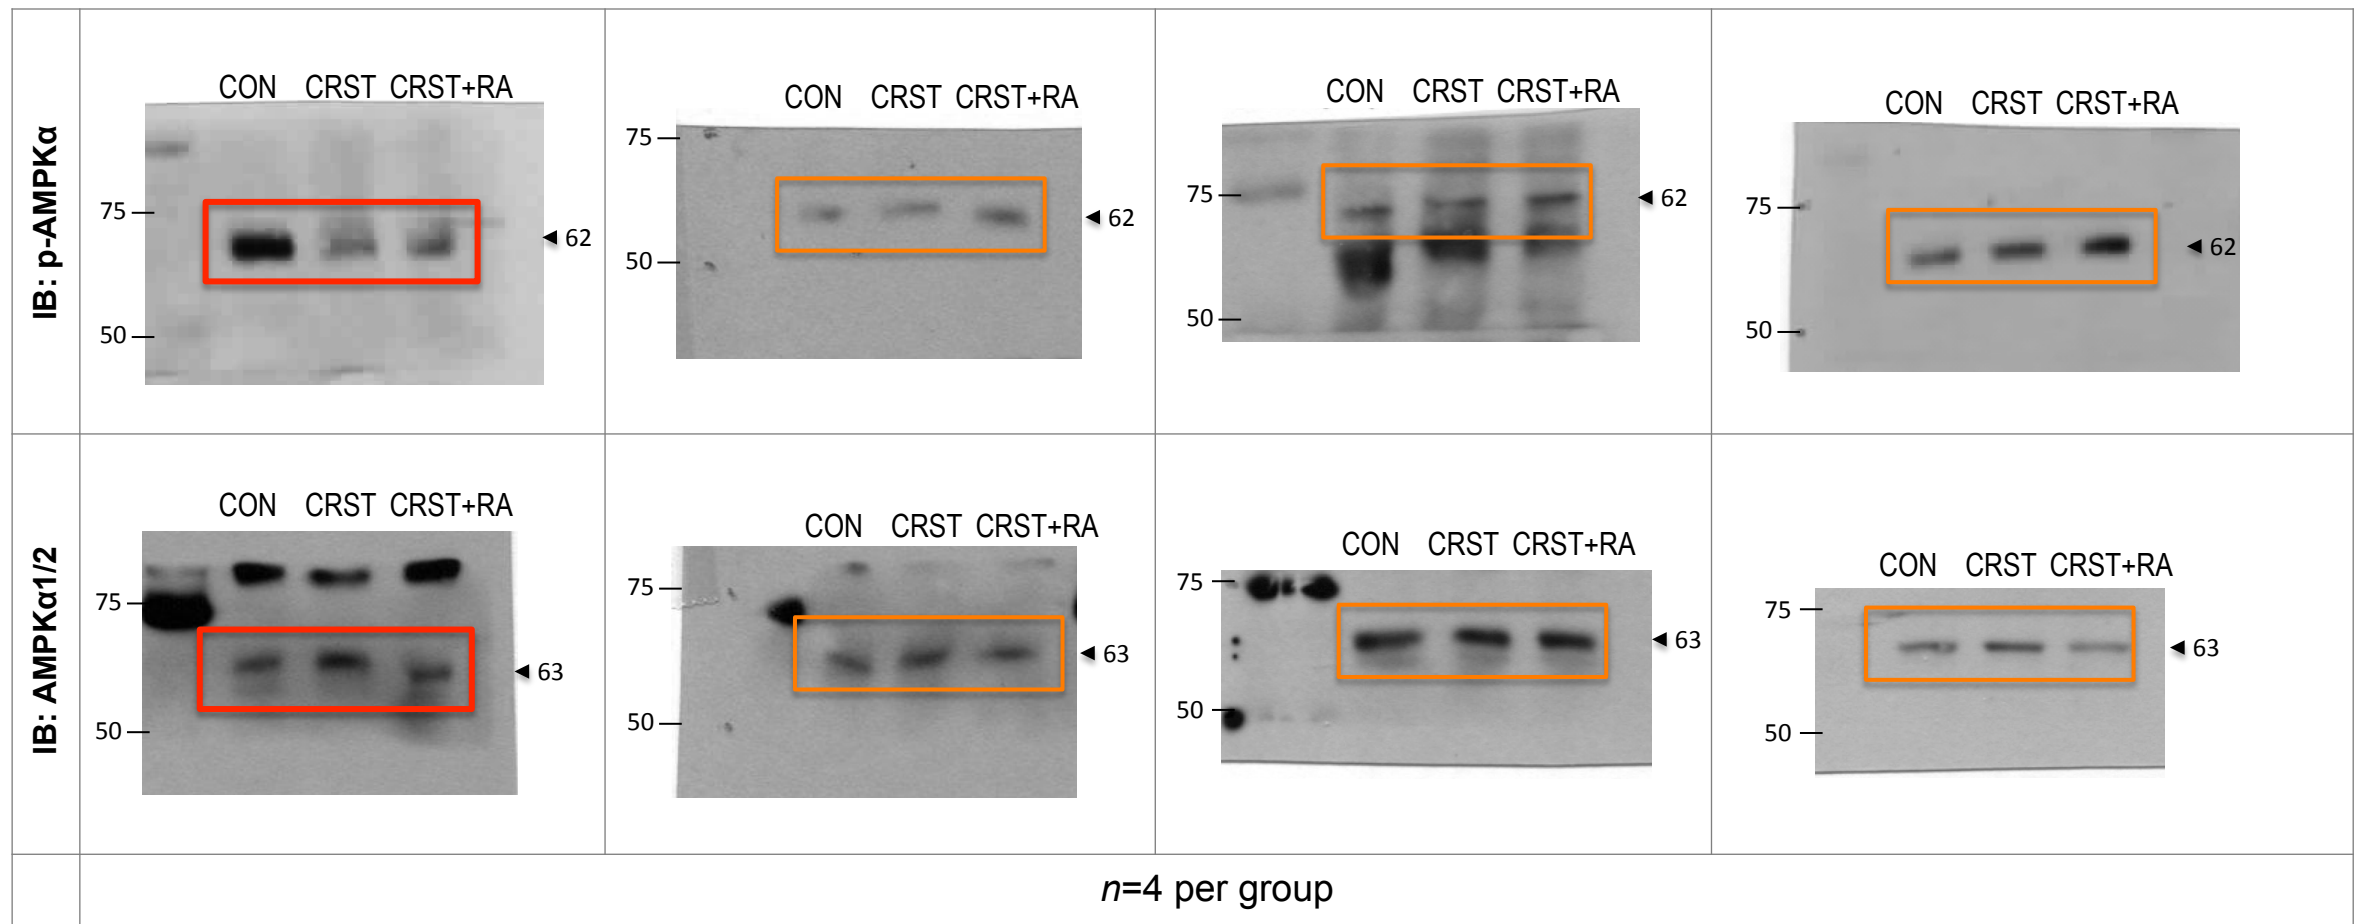

Supplement: 42003_2020_1010_MOESM2_ESM.pdf [file 42003_2020_1010_MOESM2_ESM.pdf]
